# Supplementary material
Source: HighWire-hosted journal article supplement (https://www.ez-admanager.com/content/suppl/2018/06/28/WNL.0000000000004504)
Supplement: ustrell_1536.pdf [file ustrell_1536.pdf]

# Algo de luz en las sombras de la fibrilación auricular y el infarto cerebral

## Mirar o no mirar

Xavier Ustrell, MD  
Minoru Tagawa, MD

Correspondencia y solicitud de separatas al Dr. Ustrell:  
xustrell.hj23.ics@gencat.cat

*Neurology*® 2017;89:1536–1537

En el infarto cerebral isquémico, el algoritmo diagnóstico determina la mejor estrategia preventiva. Sin embargo, el infarto cerebral criptogénico abarca entre el 20 y el 40% de todos los infartos cerebrales.<sup>1</sup> Para estos pacientes, el mejor tratamiento preventivo es desconocido, y la mayoría de las guías recomiendan modificación de los factores de riesgo y terapia antiplaquetaria. Dada la tasa de recurrencia sustancial del infarto cerebral criptogénico, esta no es una situación cómoda: simplemente traten de decirle a sus pacientes con infarto cerebral, “Luego de todas estas pruebas, no tengo idea de porqué tuvo un infarto cerebral”; y sobre el tratamiento, “Simplemente tome una aspirina y cruce los dedos para no tener otro.”

Las etiquetas utilizadas solo aumentan la confusión. Tres escenarios distintivos pueden llevar a la clasificación de un infarto cerebral como indeterminado: (1) luego de descartar los mecanismos principales se considerará el infarto cerebral como criptogénico verdadero, (2) en un escenario de múltiples mecanismos posibles o (3) con un algoritmo diagnóstico incompleto. Muchos usan los términos indeterminado y criptogénico como sinónimos. Hart et al.<sup>2</sup> propusieron la nueva definición de infarto cerebral embólico de causa indeterminada (ESUS, *embolic stroke of undetermined source*), intentando separar el infarto cerebral criptogénico de estas otras situaciones. Establecieron los criterios mínimos para esta condición; un infarto cerebral no lacunar, una angiografía o ecografía de cuello y arterias intracraneales excluyendo una estenosis  $\geq 50\%$  en las arterias, un Holter de 24 horas y ninguna otra causa específica identificada, como una arteritis, disección o vasoespasmio.

La evidencia creciente indica que una fuente embólica de menor riesgo, como placas complicadas no estenosantes, un foramen oval permeable o, tal vez más comúnmente, una fibrilación auricular (FA) oculta, son causa de una proporción sustancial de infartos cerebrales criptogénicos. Los infartos cardioembólicos debidos a FA son más severos y tienen pobre pronóstico, y el

uso de terapia anticoagulante puede realmente reducir ese riesgo. Por lo tanto, identificar una FA oculta es esencial. Un Holter de 24 horas es insuficiente para detectar la FA paroxística (FAp). Estudios recientes<sup>3,4</sup> han demostrado la utilidad de los dispositivos subcutáneos y circuitos de monitoreo externos luego de infarto cerebral criptogénico, alcanzando tasas de detección tan altas como el 25%. Un comité de expertos recientemente recomendó el uso de monitoreo prolongado para detectar FA en pacientes con infarto cerebral criptogénico.<sup>5</sup>

Un aumento en el nivel de alarma de los médicos y el desarrollo de nuevas herramientas de monitoreo han permitido incrementar el diagnóstico de FA en los ESUS, pero han aparecido nuevas preguntas. Cuando la FAp es detectada después del infarto cerebral, ¿uno realmente debe considerarla como una causa del infarto? En el ensayo Crystal de FA, el grupo con monitor insertable no mostró diferencias vs el grupo control en cuanto a la recurrencia del infarto cerebral a pesar de las diferencias en la detección de FA y el uso de anticoagulación.<sup>6</sup> Los dispositivos de monitoreo prolongado muestran alteraciones del ritmo de breve duración, que varios estudios muestran como asociadas a un mayor riesgo de infarto cerebral a pesar de no durar lo suficiente como para alcanzar los criterios de FA.<sup>7,8</sup> ¿Acaso estas alteraciones breves del ritmo representan precursores de FA o tal vez una FA de bajo impacto con un comportamiento clínico diferente? ¿Cuál es la duración mínima que tiene que tener una FA para constituir un riesgo de tromboembolismo? Los consensos de expertos han aceptado una definición de 30 segundos, pero los datos actuales generan conflicto con esta posición. La pregunta del huevo o la gallina representa otra pregunta distinta, pero relacionada: la FA detectada después del infarto cerebral, ¿es causa o es causada por el mismo infarto? La ínsula izquierda juega un rol importante en la regulación del ritmo cardíaco y se acepta un nexo entre el infarto cerebral y la generación de FA.<sup>9</sup>

Ver página 14

Del Department of Neurology (X.U.), Hospital Universitari Joan XXIII Tarragona, Spain; y Department of Cardiology (M.T.), Nagaoka Chuo General Hospital, Niigata, Japan.

Ir a [Neurology.org](http://Neurology.org) para declaraciones de intereses completas. La información sobre fondos y aquellas declaraciones relevantes para los autores, si existiesen, se encuentran al final de la editorial

En este número de *Neurology*<sup>®</sup>, Weber-Krüger et al.<sup>10</sup> utilizan un diseño inteligente para abordar 3 temas claves: (1) la duración mínima de FA que induce cardioembolismo, utilizando la severidad del infarto cerebral como un marcador sustituto; (2) si la FAp detectada luego del infarto cerebral persiste y (3) si la taquicardia supraventricular no sostenida (TSVNS), episodios de taquicardia auricular de menos de 30 segundos de duración, se asocian con un riesgo aumentado de desarrollar una futura FA, infarto cerebral o muerte. Analizaron datos de pacientes con infarto cerebral libres de FA al inicio que recibieron monitoreo Holter de 7 días y los siguieron durante un período de 3 años. Formaron 4 subgrupos de pacientes: aquellos con FA en la admisión (FA-adm), aquellos con una FAp nueva diagnosticada durante el Holter de 7 días, otro grupo con TSVNS y un último grupo sin TSVNS ni FA, utilizado como control. Repitieron otro Holter de 7 días en el grupo de FAp para chequear si la arritmia era un fenómeno transitorio o permanente.

Los pacientes con FA en la admisión y FAp durante el monitoreo tuvieron infartos cerebrales más severos en comparación con los otros grupos. Los pacientes con FA o TSVNS tuvieron una recurrencia de infarto cerebral significativamente mayor en comparación con los controles. La falta de correlación entre la duración de la FA y la severidad del infarto cerebral agrega evidencia de que otros factores –además de la duración de la FA– contribuyen a los mecanismos trombogénicos. El grupo de TSVNS tuvo un índice de recurrencia mayor y un riesgo mayor de desarrollar FA posterior, aunque con infartos cerebrales menos severos, reforzando el hallazgo anterior. Los resultados pueden sugerir que la TSVNS es probablemente no trombogénica, pero uno podría argumentar que la TSVNS y la FA reflejan diferentes etapas de una condición cardíaca local propensa al embolismo. En el grupo con FAp detectada en el Holter de 7 días, 5 de 8 pacientes que realizaron un segundo Holter de 7 días tuvieron al menos un nuevo episodio de FA, 3 de ellos permanentes. Estos resultados, aunque no definitivos debido al bajo número de pacientes, sugieren que la FAp luego de un infarto cerebral no es un fenómeno transitorio.

El estudio tiene limitaciones, y sugiere ser interpretado con cautela debido al diseño retrospectivo y el bajo número de pacientes. Potenciales confundidores, entre los que se incluyen la causa de la recurrencia y la influencia del tratamiento, no son específicamente analizados, pero los resultados obtenidos de toda la población con infarto cerebral deberían ser independientes de la etiología de infarto cerebral índice. ¿Podrían la TSVNS ser un predictor de FAp o de un futuro infarto cerebral?

Estos resultados pueden contribuir a nuevas estrategias para modificar el pronóstico del grupo de pacientes con alto riesgo de desarrollar una FA y recurrencia. Específicamente, deberían motivarnos como clínicos a generalizar nuestra alerta para FA y mejorar la selección de pacientes para monitoreo prolongado. Estos resultados pueden no cambiar nuestros tratamientos de prevención secundaria hoy, pero agregan nuevos hechos para entender la intrigante relación entre la FA y el infarto cerebral, trayendo algo de luz a las sombras.

#### FONDOS PARA EL ESTUDIO

No se reportan fondos para este estudio.

#### DECLARACIÓN DE INTERESES

No hay declaraciones financieras para realizar. Ir a [Neurology.org](http://Neurology.org) para declaraciones completas.

#### BIBLIOGRAFÍA

1. Saver JL. Cryptogenic stroke: clinical practice. *N Engl J Med* 2016;374:2065–2074.
2. Hart RG, Diener HC, Coutts SB, et al; on behalf of Cryptogenic Stroke/ESUS International Working Group. Embolic strokes of undetermined source: the case for a new clinical construct. *Lancet Neurol* 2014;13:429–438.
3. Ritter MA, Kochhäuser S, Duning T, et al. Occult atrial fibrillation in cryptogenic stroke: detection by 7-day electrocardiogram versus implantable cardiac monitors. *Stroke* 2013;44:1449–1452.
4. Cotter PE, Martin PJ, Ring L, Warburton EA, Belham M, Pugh PJ. Incidence of atrial fibrillation detected by implantable loop recorders in unexplained stroke. *Neurology* 2013;80:1546–1550.
5. Culebras A, Messé SR. Summary of evidence-based guideline update: prevention of stroke in nonvalvular atrial fibrillation: report of the Guideline Development Subcommittee of the American Academy of Neurology. *Neurology* 2014;83:1220.
6. Sanna T, Diener HC, Passman RS, et al. Cryptogenic stroke and underlying atrial fibrillation. *N Engl J Med* 2014;370:2478–2486.
7. Healey JS, Connolly SJ, Gold MR, et al; on behalf of ASSERT Investigators. Subclinical atrial fibrillation and the risk of stroke. *N Engl J Med* 2012;366:120–129.
8. Kochhäuser S, Dechering DG, Dittrich R, et al. Supraventricular premature beats and short atrial runs predict atrial fibrillation in continuously monitored patients with cryptogenic stroke. *Stroke* 2014;45:884–886.
9. Sposato LA, Riccio PM, Hachinski V. Poststroke atrial fibrillation: cause or consequence? Critical review of current views. *Neurology* 2014;82:1180–1186.
10. Weber-Krüger M, Lutz C, Zapf A, et al. Relevance of supraventricular runs detected after cerebral ischemia. *Neurology* 2017;89:1545–1552.
